# Supplementary material
Source: publisher figshare collection journal article supplement (https://karger.figshare.com/articles/dataset/_/5124553)
Supplement: Supplementary file 1 [file 1]

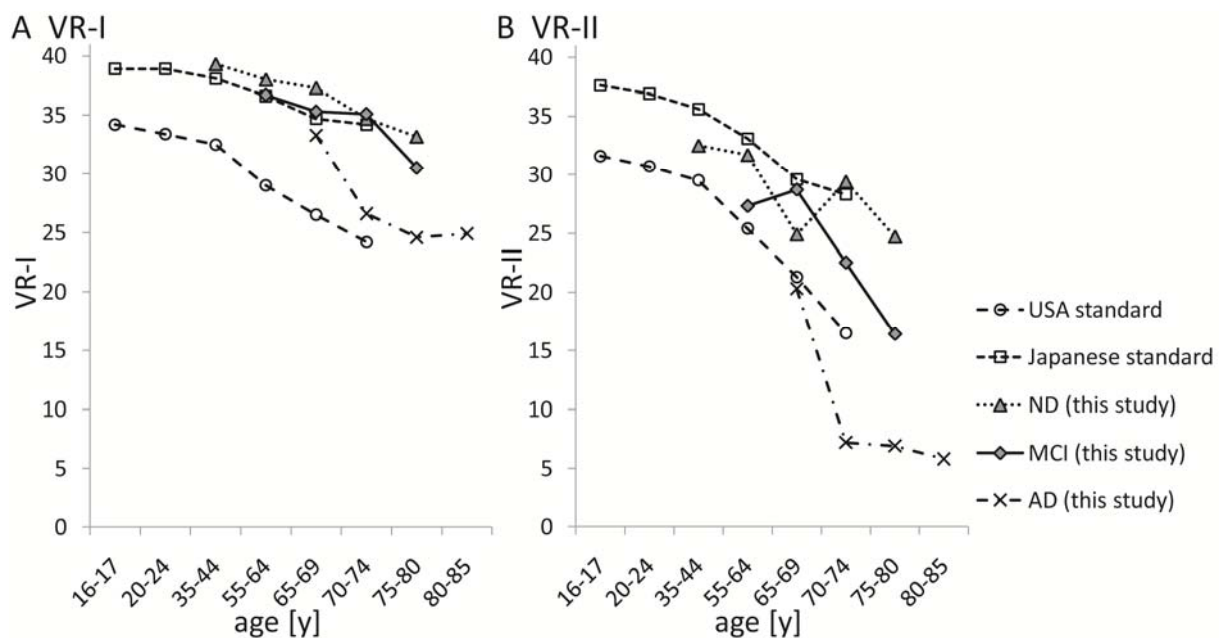

## SUPPLEMENTARY FIGURE LEGENDS

Supplementary figure 1.

Comparison of Wechsler Memory Scale-Revised (WMS-R) Visual Reproduction (VR)-I (A) and VR-II (B) scores of each age group: USA standard, Japanese standard [12], ND, MCI, and AD groups of this study. WMS-R was not standardized for subjects > 75 years old. Because there were only 2 participants in the 80- to 84-year age group in the ND and MCI groups, and only 1 patient in the 55- to 64-year age group of AD patients, these groups were omitted from these graphs.
