# Supplementary material
Source: publisher figshare collection journal article supplement (https://karger.figshare.com/articles/dataset/_/5124553)
Supplement: Supplementary file 2 [file 1]

## SUPPLEMENTARY TABLES

Supplementary table 1: WMS-R-J scores except for LM and VR, and SPECT findings in the 2y-MCI-C and 2y-MCI-NC groups

| More than 2 years followed<br>baseline MCI patients (n = 23) | <b>2y-MCI-C</b><br><b>n = 10</b> | <b>2y-MCI-NC</b><br><b>n = 13</b> | <b>p-value</b>   | <b>F</b><br><b>(df 1)</b> |
|--------------------------------------------------------------|----------------------------------|-----------------------------------|------------------|---------------------------|
| MMSE delayed recall<br>(range 0-3)                           | 1.2 (0.9)                        | 2.3 (0.6)                         | <b>0.003</b>     | 11.8                      |
| <b>WMS-R-J</b>                                               |                                  |                                   |                  |                           |
| VIPA-I (SD)                                                  | 6.8 (2.4)                        | 10.7 (4.0)                        | <b>0.013</b>     | 7.30                      |
| VIPA-II                                                      | 3.0 (1.5)                        | 4.4 (1.7)                         | 0.051            | 4.29                      |
| VIPA-II/I                                                    | 44.3 (12.7)                      | 46.5 (25.5)                       | 0.811            | 0.058                     |
| VEPA-I                                                       | 9.8 (4.3)                        | 13.3 (3.0)                        | <b>0.032</b>     | 5.28                      |
| VEPA-II                                                      | 3.9 (1.7)                        | 5.7 (1.4)                         | <b>0.010</b>     | 8.00                      |
| VEPA-II/I                                                    | 42.7 (14.3)                      | 43.7 (11.8)                       | 0.850            | 0.037                     |
| rIRI                                                         | 72.4 (16.5)                      | 97.4 (14.7)                       | <b>0.001</b>     | 14.7                      |
| rDRI                                                         | 23.5 (12.2)                      | 57.4 (14.4)                       | <b>&lt;0.001</b> | 35.7                      |
| rDRI/rIRI                                                    | 31.1 (12.2)                      | 59.2 (12.7)                       | <b>&lt;0.001</b> | 28.8                      |
| SPECT (precuneus<br>hypoperfusion) (%)                       | 6/9 (66.7)                       | 2/12 (16.7)                       | <b>0.018</b>     | <b>6.66</b>               |

Values are presented as means. SPECT was not performed in 2 patients. F, F-value; df, degrees of freedom; SD, standard deviation; 2y-MCI-C (MCI converters), MCI patients that progressed to AD within 2 years; 2y-MCI-NC (MCI non-converters), MCI patients that did not progress to dementia within 2 years; MMSE, Mini-Mental State Examination; VIPA, Visual Paired Associates; VEPA, Verbal Paired Associates; rIRI, raw score of Immediate Recall Index; rDRI, raw score of Delayed Recall Index; -I, immediate recall of that subtest; -II, delayed recall of that subtest; -II/I or rDRI/rIRI, percentage retention score (percentage retention from immediate to delayed recall).

Supplementary table 2: Analysis by multiple logistic regression of variable for more than 2y-followed baseline MCI patients (n = 23)

| Variable                        | multiple logistic regression |        |            |
|---------------------------------|------------------------------|--------|------------|
|                                 | p-value                      | OR     | 95%CI      |
| MMSE delayed recall (range 0-3) | <b>0.027</b>                 | 0.098  | 0.012-0.77 |
| <b>WMS-R-J</b>                  |                              |        |            |
| LM-I (SD)                       | <b>0.029</b>                 | 0.73   | 0.55-0.97  |
| VR-II                           | <b>0.032</b>                 | 0.75   | 0.57-0.98  |
| VR-II/I                         | <b>0.022</b>                 | <0.001 | <0.01-0.23 |
| rIRI                            | 0.109                        | 0.77   | 0.57-1.06  |
| rDRI/rIRI                       | <b>0.032</b>                 | 0.78   | 0.63-0.98  |
| SPECT (precuneus hypoperfusion) | <b>0.046</b>                 | 9.02   | 1.04-78.5  |

SPECT was performed for 21 patients. Multiple logistic regression was performed using Age, Sex and Educational years as covariates with MCI as the outcome of significantly predictive factors by univariate logistic regression analysis. MMSE, LM-II, LM-II story A, LM-II/I, VR-I, rDRI were not significant in univariate logistic regression analyses. OR, odds ratio; 95% CI, 95% confidence interval

Supplementary table 3. Correlation coefficients for MMSE and WMS-R-J indices

Supplementary table 3A: Correlation coefficients for each item in MCI patients (n = 27)

| MCI<br>(n = 27) | LM-I  | LM-II | VIPA-I | VIPA-II | VEPA-I | VEPA-II | VR-I   | VR-II | rIRI  | rDRI         |
|-----------------|-------|-------|--------|---------|--------|---------|--------|-------|-------|--------------|
| MMSE            | 0.439 | 0.230 | 0.104  | 0.174   | 0.154  | 0.106   | -0.048 | 0.143 | 0.219 | 0.199        |
| LM-I            |       | 0.727 | 0.068  | 0.151   | 0.469  | 0.358   | 0.026  | 0.344 | 0.524 | 0.503        |
| LM-II           |       |       | 0.123  | 0.097   | 0.463  | 0.450   | 0.059  | 0.476 | 0.477 | 0.670        |
| VIPA-I          |       |       |        | 0.512   | 0.306  | 0.285   | 0.421  | 0.316 | 0.682 | 0.365        |
| VIPA-II         |       |       |        |         | 0.490  | 0.518   | 0.714  | 0.426 | 0.680 | 0.542        |
| VEPA-I          |       |       |        |         |        | 0.775   | 0.465  | 0.546 | 0.840 | 0.686        |
| VEPA-II         |       |       |        |         |        |         | 0.392  | 0.559 | 0.678 | 0.734        |
| VR-I            |       |       |        |         |        |         |        | 0.667 | 0.683 | 0.626        |
| VR-II           |       |       |        |         |        |         |        |       | 0.666 | <b>0.940</b> |
| rIRI            |       |       |        |         |        |         |        |       |       | 0.781        |

Supplementary table 3B: Correlation coefficients for each item in ND participants (n = 66)

| ND<br>(n = 66) | LM-I  | LM-II | VIPA-I | VIPA-II | VEPA-I | VEPA-II | VR-I  | VR-II | rIRI  | rDRI  |
|----------------|-------|-------|--------|---------|--------|---------|-------|-------|-------|-------|
| MMSE           | 0.398 | 0.321 | 0.366  | 0.415   | 0.377  | 0.271   | 0.217 | 0.161 | 0.457 | 0.344 |
| LM-I           |       | 0.891 | 0.445  | 0.500   | 0.495  | 0.278   | 0.309 | 0.184 | 0.742 | 0.615 |
| LM-II          |       |       | 0.491  | 0.477   | 0.578  | 0.375   | 0.307 | 0.319 | 0.755 | 0.750 |
| VIPA-I         |       |       |        | 0.610   | 0.575  | 0.496   | 0.404 | 0.198 | 0.846 | 0.539 |
| VIPA-II        |       |       |        |         | 0.586  | 0.523   | 0.533 | 0.330 | 0.723 | 0.637 |
| VEPA-I         |       |       |        |         |        | 0.674   | 0.287 | 0.349 | 0.822 | 0.717 |
| VEPA-II        |       |       |        |         |        |         | 0.345 | 0.297 | 0.622 | 0.622 |
| VR-I           |       |       |        |         |        |         |       | 0.440 | 0.538 | 0.485 |
| VR-II          |       |       |        |         |        |         |       |       | 0.336 | 0.772 |
| rIRI           |       |       |        |         |        |         |       |       |       | 0.782 |

Pearson product-moment correlation coefficients > 0.9 only occur between VR-II and rDRI of

MCI patients (written in bold). MMSE, Mini-Mental State Examination; LM, Logical Memory; VR, Visual

Reproduction; VIPA, Visual Paired Associates; VEPA, Verbal Paired Associates; rIRI, raw score of

Immediate Recall Index; rDRI, raw score of Delayed Recall Index; -I, immediate recall of that subtest; -II,

delayed recall of that subtest;
